# Supplementary material
Source: PubMed Central journal article supplement (PMC3129918)
Supplement: supp_01273.2010_figS1.pdf [file supp_01273.2010_figS1.pdf]

# Supplementary Figure S1
