# Supplementary material
Source: PubMed Central journal article supplement (PMC3129918)
Supplement: supp_01273.2010_legends.pdf [file supp_01273.2010_legends.pdf]

## Supplementary Figures

**Figure S1:** Basal sarcomere shortening in CM from male WT and male and female  $sGC\alpha1^{-/-}$  mice. Data is expressed as % of sarcomere shortening. Cells were paced at 1, 2, 4, and 6 Hz. A repeated measures 2-way ANOVA was performed with Bonferroni post-hoc tests. \*  $p < 0.01$  vs. WT \*\*  $p < 0.001$  vs. WT.

**Figure S2:** The sGC activator Bay 41-2272 decreases  $\beta$ -adrenergic stimulated contractility in WT CM. The graph indicates % decrease in sarcomere shortening at 150 seconds after the start of perfusion with indicated concentrations of Bay 41-2272 in WT and  $sGC\alpha1^{-/-}$ . CM were pre-incubated and continuously perfused with 10 nM ISO.

**Figure S3:** Effect of the muscarinic agonist carbachol (CCh) on contractile function after  $\beta$ -adrenergic receptor stimulation in WT and  $sGC\alpha1^{-/-}$  CM. Data is expressed as the percentage decrease in sarcomere shortening in WT and  $sGC\alpha1^{-/-}$  CM paced at 2Hz and incubated with ISO (10 nM) followed by perfusion with CCh (10  $\mu$ M).
