# Supplementary material
Source: PubMed Central journal article supplement (PMC3129918)

Supplementary Figure S2

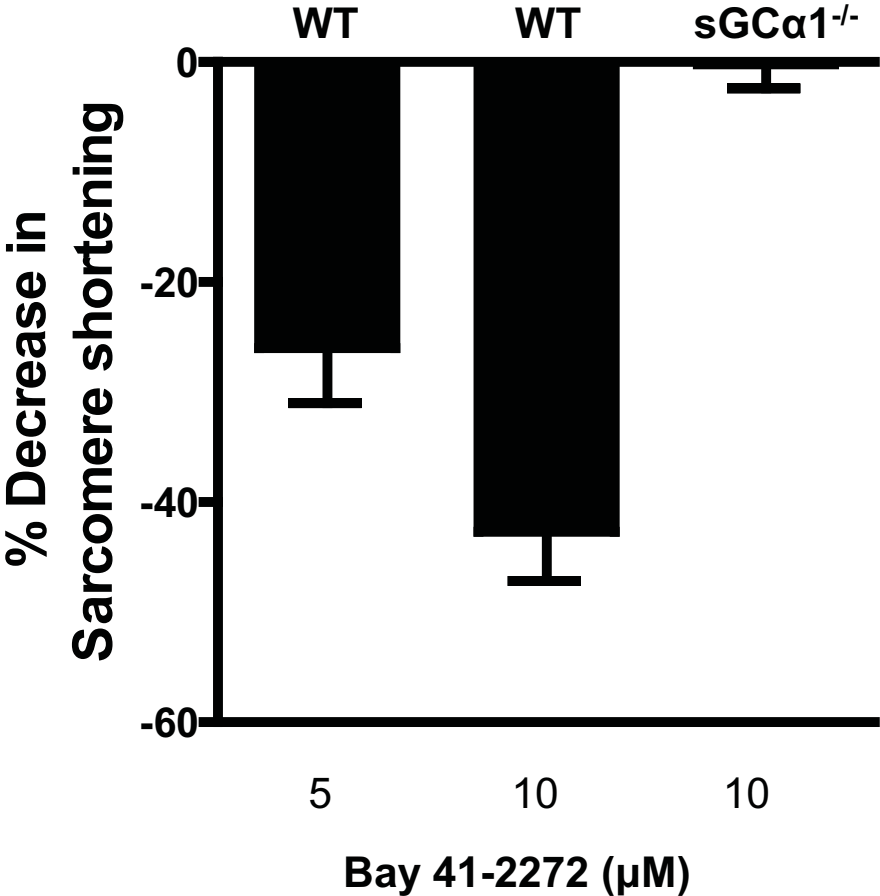

Supplement: supp_01273.2010_figS2.pdf [file supp_01273.2010_figS2.pdf]

**Supplementary Figure S3**

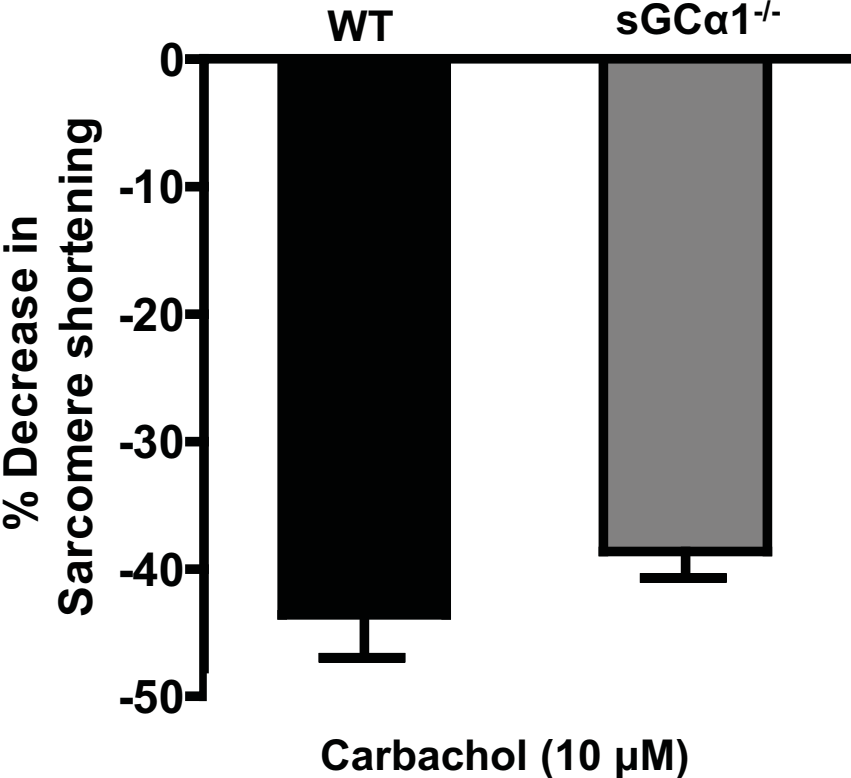

Supplement: supp_01273.2010_figS3.pdf [file supp_01273.2010_figS3.pdf]
